# Supplementary material for: Maternal transfer of environmentally relevant polybrominated diphenyl ethers (PBDEs) produces a diabetic phenotype and disrupts glucoregulatory hormones and hepatic endocannabinoids in adult mouse female offspring
Source: PubMed Central journal article supplement (PMC7582149; doi:10.1038/s41598-020-74853-9), 2020-10-22
Supplement: 41598_2020_74853_MOESM1_ESM.pdf [file 41598_2020_74853_MOESM1_ESM.pdf]

## **Supplementary Information**

# **Maternal Transfer of Environmentally Relevant Polybrominated Diphenyl Ethers (PBDEs) Produces a Diabetic Phenotype and Disrupts Glucoregulatory Hormones and Hepatic Endocannabinoids in Adult Mouse Female Offspring**

Elena V. Kozlova<sup>1</sup>, Bhuvaneswari D. Chinthirla<sup>1</sup>, Pedro A. Pérez<sup>2</sup>, Nicholas V. DiPatrizio<sup>2</sup>, Donovan A. Argueta<sup>2</sup>, Allison L. Phillips<sup>3</sup>, Heather M. Stapleton<sup>3</sup>, Gwendolyn M. González<sup>1</sup>, Julia M. Krum<sup>1</sup>, Valeria Carrillo<sup>1</sup>, Anthony E. Bishay<sup>1</sup>, Karthik R. Basappa<sup>1</sup> and Margarita C. Currás-Collazo<sup>1,\*</sup>

<sup>1</sup>Department of Molecular, Cell and Systems Biology, University of California Riverside, Riverside, California USA

<sup>2</sup> Division of Biomedical Sciences, School of Medicine, University of California Riverside, Riverside, California, USA

<sup>3</sup> Duke University, Nicholas School of the Environment, Durham, North Carolina, USA

### **\*Corresponding author:**

Dr. Margarita C. Currás-Collazo, Ph.D., FAPS  
Associate Professor of Neuroscience  
Department Molecular, Cell and Systems Biology  
University of California, Riverside  
Riverside, CA 92521  
951-827-3960  
[mcur@ucr.edu](mailto:mcur@ucr.edu)

**Supplementary Table S1.** Dam Gestational Parameters and Litter Outcomes After Chronic Low Dose exposure to DE-71

|                                      | <b>VEH/CON</b> | <b>0.1 mg/kg/d DE-71</b> | <b>0.4 mg/kg/d DE-71</b> |
|--------------------------------------|----------------|--------------------------|--------------------------|
| <b>Maternal Parameters</b>           |                |                          |                          |
| n <sup>a</sup>                       | 7              | 8                        | 11                       |
| Gestational food intake              |                |                          |                          |
| Absolute (g/day)                     | 6.83 ± 0.73    | 6.30 ± 0.34              | 6.67 ± 0.31              |
| Relative (g/pup)                     | 1.20 ± 0.20    | 1.35 ± 0.32              | 1.05 ± 0.15              |
| Gestational weight gain              |                |                          |                          |
| Absolute (g)                         | 13.98 ± 1.29   | 13.76 ± 0.57             | 13.70 ± 1.23             |
| Relative (g/pup)                     | 2.39 ± 0.27    | 2.84 ± 0.55              | 2.15 ± 0.37              |
| Relative to initial (%) <sup>b</sup> | 70.50 ± 7.03   | 66.48 ± 4.10             | 65.40 ± 5.46             |
| <b>Litter Parameters</b>             |                |                          |                          |
| n                                    | 16             | 19                       | 18                       |
| Litter size                          | 5.81 ± 0.57    | 5.79 ± 0.32              | 7.17 ± 0.51              |
| Females/litter                       | 2.56 ± 0.29    | 3.26 ± 0.33              | 3.61 ± 0.29              |
| Males/litter                         | 3.25 ± 0.48    | 2.68 ± 0.32              | 3.56 ± 0.40              |
| Secondary sex ratio (M/F)            | 0.54 ± 0.04    | 0.46 ± 0.05              | 0.48 ± 0.04              |

<sup>a</sup>indicates number of dams per treatment group

<sup>b</sup>Initial weight was taken at 18 days before pup birth

Data are expressed as mean±s.e.m. Food intake was measured from GD13-GD18. Maternal weight gain was calculated as difference in weight from pre-pregnancy to late gestation (GD 16-18). Relative weight gain was normalized to pre-pregnancy weight (initial) and to total pups in litter (relative). Litter size was measured at PND0 to avoid the confound of infanticide typical of primiparous C57BL/6 dams. The secondary sex ratio was calculated as the proportion of the total pups that are male.

**Supplementary Table S2.** Mass Spectrometric Analysis (GC/ECNIMS) of PBDE congeners in DE-71-exposed mouse dams and their female offspring

| Compound/Substituents                                       | IUPAC Number    | Dams    |                 |                          | Female Offspring |                 |                 |
|-------------------------------------------------------------|-----------------|---------|-----------------|--------------------------|------------------|-----------------|-----------------|
|                                                             |                 | VEH/CON | 0.1 mg/kg DE-71 | 0.4 mg/kg DE-71          | VEH/CON          | 0.1 mg/kg DE-71 | 0.4 mg/kg DE-71 |
| n                                                           |                 | 4       | 4               | 3                        | 4                | 4               | 4               |
| 2,2',4-tri BDE                                              | BDE 17          | <MDL    | <MDL            | <MDL                     | <MDL             | <MDL            | <MDL            |
| 2,3',4-tri BDE                                              | BDE 25          | <MDL    | <MDL            | <MDL                     | <MDL             | <MDL            | <MDL            |
| 2,4,4'-tri BDE,<br>2',3,4-tri BDE                           | BDE 28,<br>33   | <MDL    | 16.9 ± 4.05*    | 13.0 ± 2.55 <sup>b</sup> | <MDL             | 7.04 ± 3.93     | 22.8 ± 8.15*    |
| 2,4,6,-tri BDE                                              | BDE 30          | <MDL    | <MDL            | <MDL                     | <MDL             | <MDL            | <MDL            |
| 2,2',4,4'-tetra BDE                                         | BDE 47          | <MDL    | 422 ± 110*      | 192 ± 151                | <MDL             | <MDL            | <MDL            |
| 2,2',4,5'-tetra BDE                                         | BDE 49          | <MDL    | <MDL            | <MDL                     | <MDL             | <MDL            | <MDL            |
| 2,3',4,4'-tetra BDE                                         | BDE 66          | <MDL    | 17.9 ± 6.18     | 14.6 ± 8.05              | <MDL             | <MDL            | <MDL            |
| 2,3',4',6-tetra BDE                                         | BDE 71          | <MDL    | <MDL            | <MDL                     | <MDL             | <MDL            | <MDL            |
| 2,4,4',6-tetra BDE                                          | BDE 75          | <MDL    | <MDL            | <MDL                     | <MDL             | <MDL            | <MDL            |
| 2,2',3,4,4'-penta BDE,<br>2,2',4,4',6,6'-hexa BDE           | BDE 85,<br>155  | <MDL    | 119 ± 11.0**    | 138 ± 31.2***            | <MDL             | <MDL            | <MDL            |
| 2,2',4,4',5-penta BDE                                       | BDE 99          | <MDL    | 1305 ± 153**    | 743 ± 425                | <MDL             | <MDL            | <MDL            |
| 2,2',4,4',6-penta BDE                                       | BDE 100         | <MDL    | 426 ± 41.7***   | 267 ± 86.9*              | <MDL             | <MDL            | <MDL            |
| 2,3,4,5,6-penta BDE                                         | BDE 116         | <MDL    | <MDL            | <MDL                     | <MDL             | <MDL            | <MDL            |
| 2,3',4,4',6-penta BDE                                       | BDE 119         | <MDL    | <MDL            | <MDL                     | <MDL             | <MDL            | <MDL            |
| 2,2',3,4,4',5'-hexa BDE                                     | BDE 138         | <MDL    | <MDL            | <MDL                     | <MDL             | <MDL            | <MDL            |
| 2,2',4,4',5,5'-hexa BDE                                     | BDE 153         | <MDL    | 652 ± 52.9**    | 1655 ± 206****,^^^       | <MDL             | 205 ± 27.7*     | 1008 ± 102**,^  |
| 2,2',4,4',5,6'-hexa BDE                                     | BDE 154         | <MDL    | 57.4 ± 5.61*    | 68.9 ± 25.6*             | <MDL             | <MDL            | <MDL            |
| 2, 3,3',4,4',5-hexa BDE                                     | BDE 156         | <MDL    | <MDL            | <MDL                     | <MDL             | <MDL            | <MDL            |
| 2,2', 3,4,4',5,6-hepta BDE                                  | BDE 181         | <MDL    | <MDL            | <MDL                     | <MDL             | <MDL            | <MDL            |
| 2,2', 3, 4,4',5',6-hepta BDE                                | BDE 183         | <MDL    | 39.6 ± 6.94**   | 29.5 ± 8.76*             | <MDL             | <MDL            | <MDL            |
| 2,3,3',4,4',5,6-hepta BDE                                   | BDE 190         | <MDL    | <MDL            | <MDL                     | <MDL             | <MDL            | <MDL            |
| 2, 3,3',4,4',5',6-hepta BDE                                 | BDE 191         | <MDL    | <MDL            | <MDL                     | <MDL             | <MDL            | <MDL            |
| 2,2',3,3',4,5,6,6'-octa BDE,<br>2,2',3,4,4',5,5',6-octa BDE | BDE 200,<br>203 | <MDL    | <MDL            | <MDL                     | <MDL             | <MDL            | <MDL            |
| 2, 3,3',4,4',5,5',6-octa BDE                                | BDE 205         | <MDL    | <MDL            | <MDL                     | <MDL             | <MDL            | <MDL            |
| 2,2',3,3',4,4',5,5',6-nona BDE                              | BDE 206         | <MDL    | <MDL            | <MDL                     | <MDL             | <MDL            | <MDL            |
| 2,2',3,3',4,4',5,5',6,6'-deca BDE                           | BDE 209         | <MDL    | <MDL            | <MDL                     | <MDL             | <MDL            | <MDL            |
| ΣPBDEs                                                      |                 | <MDL    | 206 ± 1.30      | 1017 ± 0.37              | <MDL             | 2996 ± 1.26     | 2915 ± 1.57     |

Content was measured as ng/g lipid

Values in table are expressed as mean±s.e.m.

ΣPBDEs are reported as geometric mean ± geometric standard deviation

\* Indicates a statistically significant n apparent difference relative to VEH/CON by Dunnet's T3 *post hoc* test following Brown-Forsythe ANOVA or Tukey's *post hoc* test following One-way ANOVA ( $P < .05$ )

^^^ Indicates significantly different relative to 0.1mg/kg group by Tukey's *post hoc* test following One-way ANOVA ( $P < .001$ )

<sup>a</sup> vs VEH/CON 0.4mg/kg  $P = .06$

BDE, brominated diphenyl ether; IUPAC, International Union of Pure and Applied Chemistry; MDL, method detection limit

**Supplementary Table S3.** Chronic Low Dose DE-71 Exposure Has Minimal Effects on Body and Selected Organ Weights and lowers BAT Weight

|                         | VEH/CON       | 0.1 mg/kg/d DE-71 | 0.4 mg/kg/d DE-71            |
|-------------------------|---------------|-------------------|------------------------------|
| <b>Dams</b>             |               |                   |                              |
| n                       | 23            | 26                | 21                           |
| Necropsy body weight    | 24.19 ± 0.36  | 24.02 ± 0.35      | 25.05 ± 0.59                 |
| Liver                   |               |                   |                              |
| Absolute                | 1.10 ± 0.03   | 1.20 ± 0.04       | 1.11 ± 0.03                  |
| Relative                | 45.41 ± 0.89  | 49.75 ± 1.46*     | 44.33 ± 0.96 <sup>^</sup>    |
| Pancreas                |               |                   |                              |
| Absolute                | 0.17 ± 0.01   | 0.18 ± 0.008      | 0.17 ± 0.01                  |
| Relative                | 6.97 ± 0.34   | 7.60 ± 0.26       | 6.99 ± 0.39                  |
| Spleen                  |               |                   |                              |
| Absolute                | 0.09 ± 0.004  | 0.09 ± 0.002      | 0.09 ± 0.004                 |
| Relative                | 3.86 ± 0.13   | 3.72 ± 0.11       | 3.74 ± 0.18                  |
| BAT (n=8-11)            |               |                   |                              |
| Absolute                | 0.06 ± 0.004  | 0.06 ± 0.004      | 0.07 ± 0.007                 |
| Relative                | 2.41 ± 0.15   | 2.32 ± 0.08       | 2.70 ± 0.22                  |
| <b>Female Offspring</b> |               |                   |                              |
| n                       | 22            | 30                | 28                           |
| Necropsy body weight    | 20.80 ± 0.44  | 19.42 ± 0.37*     | 21.73 ± 0.39 <sup>^^^</sup>  |
| Liver                   |               |                   |                              |
| Absolute                | 0.90 ± 0.02   | 0.86 ± 0.02       | 0.99 ± 0.02*, <sup>^^^</sup> |
| Relative                | 43.41 ± 0.86  | 44.16 ± 0.75      | 45.55 ± 0.73                 |
| Pancreas                |               |                   |                              |
| Absolute                | 0.14 ± 0.005  | 0.14 ± 0.006      | 0.16 ± 0.006                 |
| Relative                | 6.95 ± 0.23   | 7.32 ± 0.25       | 7.30 ± 0.31                  |
| Spleen                  |               |                   |                              |
| Absolute                | 0.08 ± 0.002  | 0.07 ± 0.003      | 0.07 ± 0.002                 |
| Relative                | 3.73 ± 0.11   | 3.75 ± 0.13       | 3.41 ± 0.10                  |
| BAT (n=13-33)           |               |                   |                              |
| Absolute                | 0.062 ± 0.006 | 0.049 ± 0.003*    | 0.054 ± 0.005                |
| Relative                | 3.51 ± 0.38   | 2.41 ± 0.14*      | 2.68 ± 0.18                  |

Body weights and organ weights and BAT (absolute weights) are in grams; organ/BAT-weight-to-body-weight ratios (relative weights) are given as mg organ weight/g body weight. Values are reported as mean±s.e.m.

<sup>^^^</sup> Indicates significantly different relative to 0.1mg/kg group by Tukey's *post hoc* test following One-way ANOVA ( $P<.001$ )

<sup>^</sup> Indicates significantly different relative to 0.1mg/kg group by Dunnet's T3 *post hoc* test following Brown-Forsythe One-way ANOVA ( $P<.05$ )

\* Indicates an apparent difference relative to VEH/CON by Dunnet's T3 *post hoc* test following Brown-Forsythe One-way ANOVA or Holm Sidak's or Tukey's *post hoc* test following One-way ANOVA ( $P<.05$ )

BAT, brown adipose tissue

## Supplementary Statistical Results:

**Figure 2:** BDE congener analysis in liver of DE-71-exposed mouse dams and their adult female offspring. (a) F1 liver  $\Sigma$ PBDEs, Brown-Forsythe ANOVA: Exposure  $F_{(2,0,3.5)}=91.9$ ,  $P<.001$ . F0 liver, One-way ANOVA:  $F_{(2,8)}=17.8$ ,  $P<.001$ . Liver  $\Sigma$ PBDEs (F1 vs F0), Mann Whitney U Test for F0 mdn=3034 (2410-3721) and F1 mdn=208 (162-265) groups ( $U=0$ ,  $P<.05$ ). (c) F1 Liver BDE-28/33, One-way ANOVA: Exposure  $F_{(2,9)}=4.9$ ,  $P<.05$ . F0 Liver BDE-28/33, Brown-Forsythe ANOVA: Exposure  $F_{(2,4.6)}=10.7$ ,  $P<.05$ . F0 Liver BDE-66, One-way ANOVA: Exposure  $F_{(2,8)}=3.3$ , n.s. F0 Liver BDE-154, One-way ANOVA:  $F_{(2,8)}=9.3$ ,  $P<.01$ . F0 Liver BDE-183,  $F_{(2,8)}=12.7$ ,  $P<.01$ . (d) F0 Liver BDE-47, One-way ANOVA: Exposure  $F_{(2,8)}=5.1$ ,  $P<.05$ . Liver F0 BDE-85/155, One-way ANOVA: Exposure  $F_{(2,8)}=22.9$ ,  $P<.001$ . Liver F0 BDE-99, One-way ANOVA: Exposure  $F_{(2,8)}=10.0$ ,  $P<.01$ . Liver F0 BDE-100, One-way ANOVA: Exposure  $F_{(2,8)}=22.3$ ,  $P<.001$ . Liver F1 BDE-153, Brown-Forsythe ANOVA,  $F_{(2,3.4)}=76.5$ ,  $P<.01$ . Liver F0 BDE-153, One-way ANOVA: Exposure  $F_{(2,8)}=65.0$ ,  $P<.0001$ . n=3-4 replicates/group, analyzed in triplicate.  $\Sigma$ PBDE, the sum of concentration of 9 (F0) or 2 (F1) PBDE congeners; F1, female offspring; F0, dams

**Figure 3.** DE-71 exposure produces elevated fasting blood glucose (FBG) and greater glucose intolerance in perinatally exposed female offspring but not than their mothers. (a) Offspring FBG, Two-way ANOVA: Time  $F_{(1,50)}=8.7$ ,  $P<.01$ ; Exposure  $F_{(2,50)}=5.0$ ,  $P<.05$ ; Interaction  $F_{(2,50)}=15.2$ ,  $P<.0001$ . (b) Dams FBG, Two-way ANOVA: Time  $F_{(1,49)}=5.2$ , ns; Exposure  $F_{(2,49)}=0.6$ , ns; Interaction  $F_{(2,49)}=0.21$ , ns. n=7-12/group. ns, not significant

**Figure 4.** DE-71 exposure produces greater glucose intolerance after perinatal exposure compared to adult exposure. (a) Offspring IPGTT, RM Two-way ANOVA: Time  $F_{(4,96)}=110.7$ ,  $P<.001$ ; Exposure  $F_{(2,24)}=3.9$ ,  $P<.01$ ; Interaction  $F_{(8,96)}=2.7$ ,  $P<.05$ . (d) Dams IPGTT, Mixed-effects model ANOVA (Geisser-Greenhouse's  $\epsilon=0.55$ ): Time  $F_{(2.2,46.0)}=90.8$ ,  $P<.0001$ ; Exposure  $F_{(2,21)}=1.5$ , n.s.; Interaction

$F_{(8,83)}=2.0$ , n.s. **(b)** Mean values for integrated area under the IPGTT glucose curve ( $AUC_{IPGTTglucose}$ ). Offspring  $AUC_{IPGTTglucose}$ , Brown-Forsythe ANOVA: Exposure  $F_{(2,0,15.3)}=4.9$ ,  $P<.05$ . **(e)** Dams  $AUC_{IPGTTglucose}$ , Brown-Forsythe ANOVA: Exposure  $F_{(2,0,14.9)}=1.3$ , ns. **(c)** Offspring Latency to Maximum Glycemia, Brown-Forsythe ANOVA: Exposure  $F_{(2,14.8)}=3.7$ ,  $P<.05$ . **(f)** Dams Latency to Maximum Glycemia, One-way ANOVA: Exposure  $F_{(2,21)}=1.6$ , n.s. **(g)** Offspring Percent basal IPGTT, RM Two-way ANOVA: Time  $F_{(4,96)}=83.6$ ,  $P<.0001$ ; Exposure  $F_{(2,24)}=3.2$ ,  $P=.057$ ; Interaction  $F_{(8,96)}=2.9$ ,  $P<.05$ . **(i)** Dams Percent basal IPGTT, RM Two-way ANOVA: Time  $F_{(4,80)}=69.4$ ,  $P<.0001$ ; Exposure  $F_{(2,20)}=3.4$ ,  $P=.06$ ; Interaction  $F_{(8,80)}=1.6$ , n.s. **(h)** Offspring  $AUC_{IPGTTglucose}$ , One-way ANOVA: Exposure  $F_{(2,24)}=3.9$ ,  $P<.05$ . **(j)** Dams  $AUC_{IPGTTglucose}$ , One-way ANOVA: Exposure  $F_{(2,20)}=3.3$ ,  $P=.06$ . ns, not significant

**Figure 5.** DE-71 exposure causes less glycemia reduction and delayed glucose clearance after insulin challenge in female offspring (F1) but not (F0) their mothers. **(a)** Offspring ITT: RM Two-way ANOVA: Time  $F_{(6,156)}=62.1$ ,  $P<.0001$ ; Exposure  $F_{(2,26)}=7.4$ ,  $P<.01$ ; Interaction  $F_{(12,156)}=3.8$ ,  $P<.0001$ . **(e)** Dams ITT, Mixed-model ANOVA: Time  $F_{(6,165)}=41.5$ ,  $P<.0001$ ; Exposure  $F_{(2,28)}=0.3$ , n.s.; Interaction  $F_{(12,165)}=1.0$ , n.s. **(b)** Offspring Inverse  $AUC_{ITTglucose}$ , One-way ANOVA: Exposure  $F_{(2,26)}=4.4$ ,  $P<.05$ . **(f)** Dams Inverse  $AUC_{ITTglucose}$ , One-way ANOVA: Exposure  $F_{(2,28)}=0.01$ , n.s. **(c)** Offspring  $K_{ITT}$ , One-way ANOVA:  $F_{(2,21)}=3.1$ ,  $P=.06$ . **(g)** Dams  $K_{ITT}$ , One-way ANOVA:  $F_{(2,20)}=1.1$ , n.s. **(d)** Offspring (F1) Latency to Minimum Glycemia, One-way ANOVA:  $F_{(2,26)}=8.5$ ,  $P<.01$ . **(h)** Dams (F0) Latency to Minimum Glycemia, Brown-Forsythe ANOVA:  $F_{(2,16.63)}=1.7$ , n.s. **(i)** Offspring (F1) Percent basal ITT, RM Two-way ANOVA: Time  $F_{(6,156)}=71.4$ ,  $P<.0001$ ; Exposure  $F_{(2,26)}=2.4$ , n.s.; Interaction  $F_{(12,156)}=3.2$ ,  $P<.0001$ . **(k)** Dams (F0) Percent Basal Glycemia, Mixed effects model ANOVA: Time  $F_{(6,167)}=38.0$ ,  $P<.0001$ ; Exposure  $F_{(2,28)}=0.2$ , n.s.; Interaction  $F_{(12,167)}=1.0$ , n.s. **(j)** Offspring  $AUC_{ITTglucose}$ , One-way ANOVA: Exposure  $F_{(2,26)}=3.1$ ,  $P=.06$ . **(l)** Dams,  $AUC_{ITTglucose}$ , One-Way ANOVA: Exposure  $F_{(2,27)}=.21$ , n.s. Dunnet's and Tukey's *post-hoc* tests were used. ns, not significant

**Figure 6.** Endocrine-disrupting effects of DE-71 on glucose regulatory hormones in F0 and F1 female mice. **(a)** Offspring (F1) Plasma Insulin Levels, Kruskal-Wallis test: Exposure  $H(2)=10.5$ ,  $P<.01$ . Dam (F0) Insulin Levels, Brown-Forsythe ANOVA: Exposure  $F_{(2,41.5)}=2.1$ , n.s. **(b)** Offspring Plasma Glucagon Levels, Brown-Forsythe ANOVA: Exposure  $F_{(2,10.0)}=3.7$ ,  $P=.065$ . Dam (F0) Glucagon Plasma Levels, Brown-Forsythe ANOVA: Exposure  $F_{(2,9.9)}=3.0$ ,  $P=0.1$ . **(c)** Offspring (F1) Plasma GLP-1 Levels: Exposure, One-way ANOVA:  $F_{(2,30)}=.6$ , n.s. Dam Plasma GLP-1 Levels, One-way ANOVA: Exposure  $F_{(2,23)}=6.0$ ,  $P<.01$  followed by Tukey's *post-hoc* test. Dunnett's, Dunn's and Tukey's *post hoc* tests were used. F1, female offspring; F0, dams; ns, not significant.

**Figure 7.** DE-71 exposure increases adrenal epinephrine content in F0 and F1 females and decreases brown adipose tissue mass in F1 female mice. **(a)** Adrenal Epinephrine Content. Offspring Epinephrine, Brown-Forsythe ANOVA: Exposure  $F_{(2,9.3)}=38.1$ ,  $P<.0001$ . Dams Epinephrine, One-way ANOVA: Exposure  $F_{(2,17)}=16.3$ ,  $P<.0001$ . **(b)** Intrascapular brown adipose tissue (BAT) normalized to body weight. Offspring BAT, One-way ANOVA: Exposure  $F_{(2,57)}=4.8$ ,  $P<.05$ . Dam BAT: Brown-Forsythe ANOVA: Exposure  $F_{(2,20.5)}=1.5$ , n.s. Dunnett's T3 or Tukey's *post-hoc* tests were used. F1, female offspring; F0, dams; BAT, brown adipose tissue; ns, not significant.

**Figure 8.** DE-71 exposure reduces hepatic activity of glutamate dehydrogenase (GDH) in F1 and F0 female mice. Offspring (F1) GDH, Brown-Forsythe ANOVA: Exposure  $F_{(2,14)}=59.1$ ,  $P<.0001$ . Dams (F0) GDH, One-way ANOVA: Exposure  $F_{(2,20)}=46.1$ ,  $P<.0001$ . F1, female offspring; F0, dams. Dunnett's T3 (F1) or Tukey's (F0) *post-hoc* tests were used.

**Figure 9.** DE-71 exposure increases hepatic levels of endocannabinoid (EC) and related fatty acid-ethanolamides in exposed F1 but not F0 female mice. **(a)** Offspring (F1) AEA, Brown-Forsythe ANOVA: Exposure  $F_{(2,10.6)}=4.1$ ,  $P<.05$ . Offspring (F1) DHEA, Welch's ANOVA: Exposure  $F_{(2,10.3)}=6.0$ ,

$P < .05$ . Offspring OEA, Welch's ANOVA: Exposure  $F_{(2,11.6)} = 3.4$ ,  $P = 0.069$ . **(b)** Offspring (F1) 2-AG, One-way ANOVA: Exposure  $F_{(2,19)} = .79$ , n.s. Offspring 2-DG, Brown-Forsythe ANOVA: Exposure  $F_{(2,30)} = 1.15$ , n.s. **(c)** Dam (F0) AEA, One-way ANOVA: Exposure  $F_{(2,9)} = .64$ , n.s. Dam (F0) DHEA, One-way ANOVA: Exposure  $F_{(2,8)} = .16$ , n.s. Dam OEA, One-way ANOVA: Exposure  $F_{(2,9)} = .21$ , n.s. **(d)** Dam (F0) 2-AG, One-way ANOVA: Exposure  $F_{(2,9)} = .81$ . Dam (F0) 2-DG, One-way ANOVA: Exposure  $F_{(2,9)} = .95$ , n.s. Dunnett's T3 and Tukey's *post-hoc* test was used. EC, endocannabinoid; AEA, arachidonylethanolamide (Anandamide); DHEA, docosahexanoyl ethanolamide; OEA, n-oleoyl ethanolamide; 2-AG, 2-arachidonoyl-*sn*-glycerol; 2-DG, monoacylglycerol; 2-docosahexaenoyl-*sn*-glycerol. ns, not significant
